# Supplementary material for: A novel graphene-based label-free fluorescence ‘turn-on’ nanosensor for selective and sensitive detection of phosphorylated species in biological samples and living cells
Source: Royal Society of Chemistry journal article supplement (doi:10.1039/c5nr07261a), 2015-12-22
Supplement: c5nr07261a1.pdf [file c5nr07261a1.pdf]

## Supporting Information for Publication

# A novel graphene-based label-free fluorescence ‘turn-on’ nanosensor for selective and sensitive detection of phosphorylated species in biological samples and living cells

Yaotang Ke,<sup>a,†</sup> Bhaskar Garg<sup>a,†</sup> and Yong-Chien Ling<sup>a,b,\*</sup>

<sup>a</sup> Department of Chemistry, National Tsing Hua University, Kuang-Fu Road, Hsinchu, 30013, Taiwan

<sup>b</sup> Institute of Nano Engineering and Microsystem, National Tsing Hua University, Kuang-Fu Road, Hsinchu, 30013, Taiwan

E-mail: [ycling@mx.nthu.edu.tw](mailto:ycling@mx.nthu.edu.tw)

<sup>†</sup> The authors have contributed equally to this work

| <b>Table of contents</b>                                                        | <b>Pages</b> |
|---------------------------------------------------------------------------------|--------------|
| FT-IR and TGA data of graphene-based nanomaterials                              | S2           |
| XPS spectra of graphene-based nanomaterials                                     | S3           |
| Equilibrium adsorption isotherm of FMNs                                         | S4           |
| Time vs. adsorption plots of FMNs at different concentrations                   | S5           |
| Fluorescence intensity vs. time plots of nanosensor under different conditions  | S5           |
| Emission spectral changes of nanosensor with different analytes                 | S6           |
| MALDI-TOF/TOF MS/MS spectra of precursor ions from human serum                  | S7           |
| MALDI-TOF mass spectra of non-fat milk and nanosensor                           | S8           |
| Selectivity studies of nanosensor for different biomolecules                    | S9           |
| 3D reconstruction CLSM images of Tramp-C1 cells                                 | S10          |
| Standard addition method for the tryptic digest of egg white sample             | S11          |
| Table for LOD values for different proteins                                     | S12          |
| Table for (de)phosphorylated fragments from tryptic digest of non-fat milk      | S12          |
| Table for (de)phosphorylated fragments from tryptic digest of chicken egg white | S13          |
| Table for (de)phosphorylated fragments from tryptic digest of human serum       | S14          |

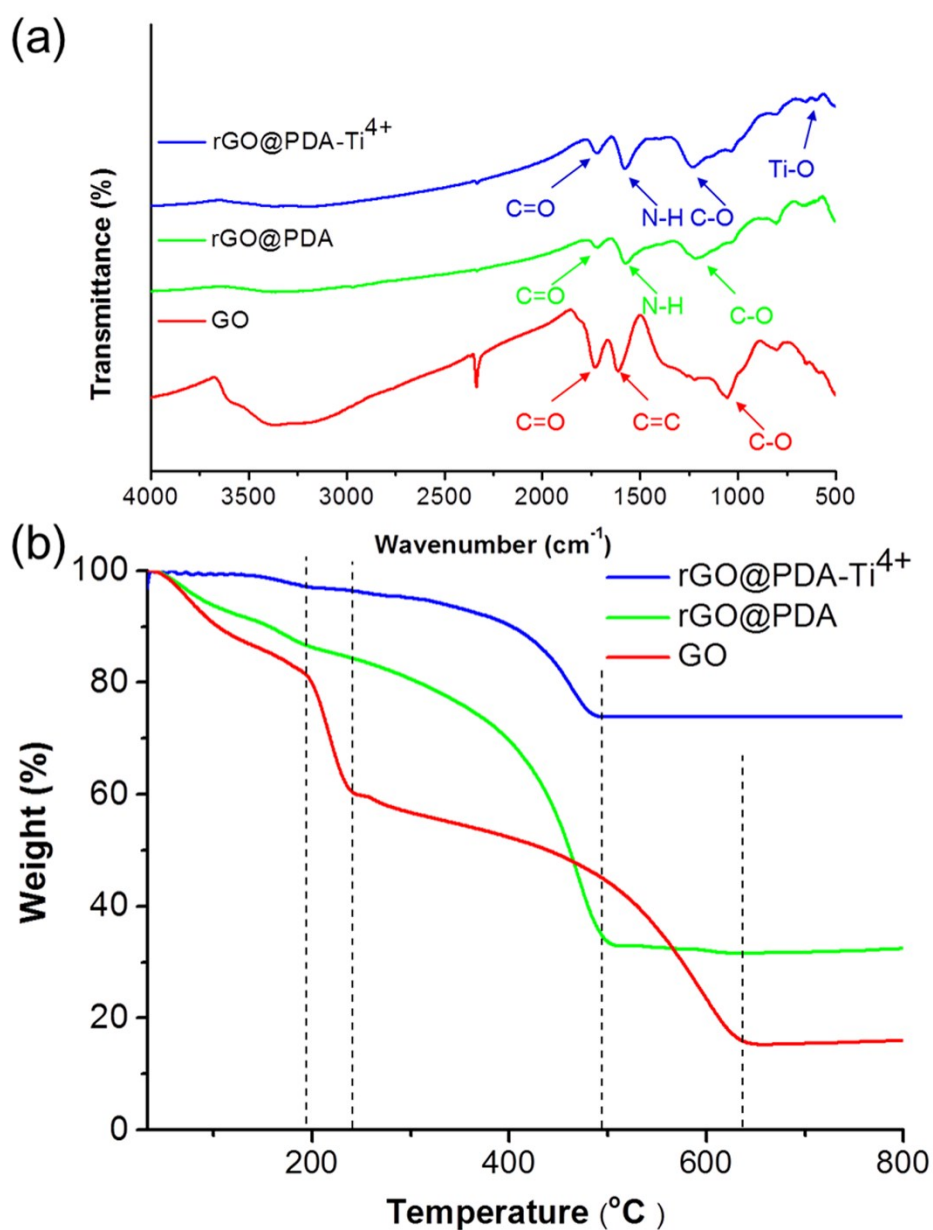

**Fig. S1.** (a) FTIR spectra of GO, rGO@PDA and rGO@PDA-Ti<sup>4+</sup> (b) TGA curves of GO, rGO@PDA and rGO@PDA-Ti<sup>4+</sup>

## Supporting Information for Publication

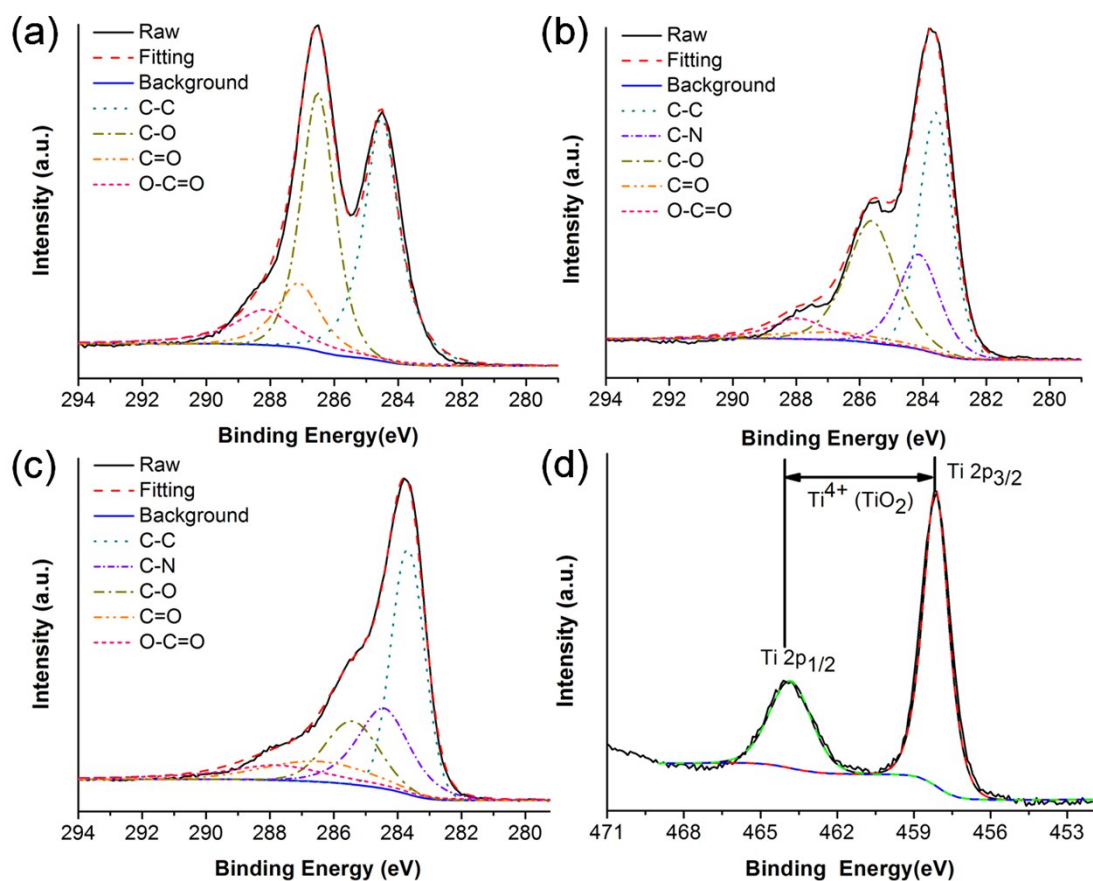

**Fig. S2.** XPS C1s core-level spectra and fitted curves of (a) GO, (b) rGO@PDA, and (c) rGO@PDA-Ti<sup>4+</sup>. Ti 2p core-level spectra and fitted curves of (d) rGO@PDA-Ti<sup>4+</sup>.

### Supporting Information for Publication

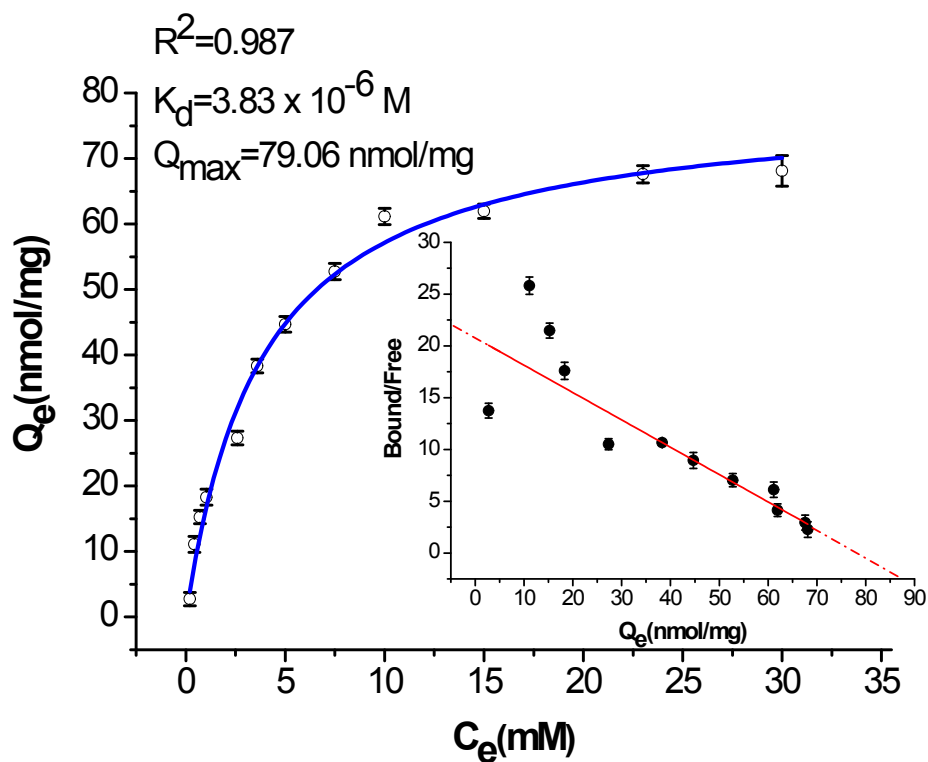

**Fig. S3.** Equilibrium adsorption isotherm of FMNs binding onto rGO@PDA-Ti<sup>4+</sup> surface in acidic buffer (pH 4.5). Inset: Scatchard plot for the adsorption of FMNs by rGO@PDA-Ti<sup>4+</sup>. The mean values of three independent measurements are presented.

## Supporting Information for Publication

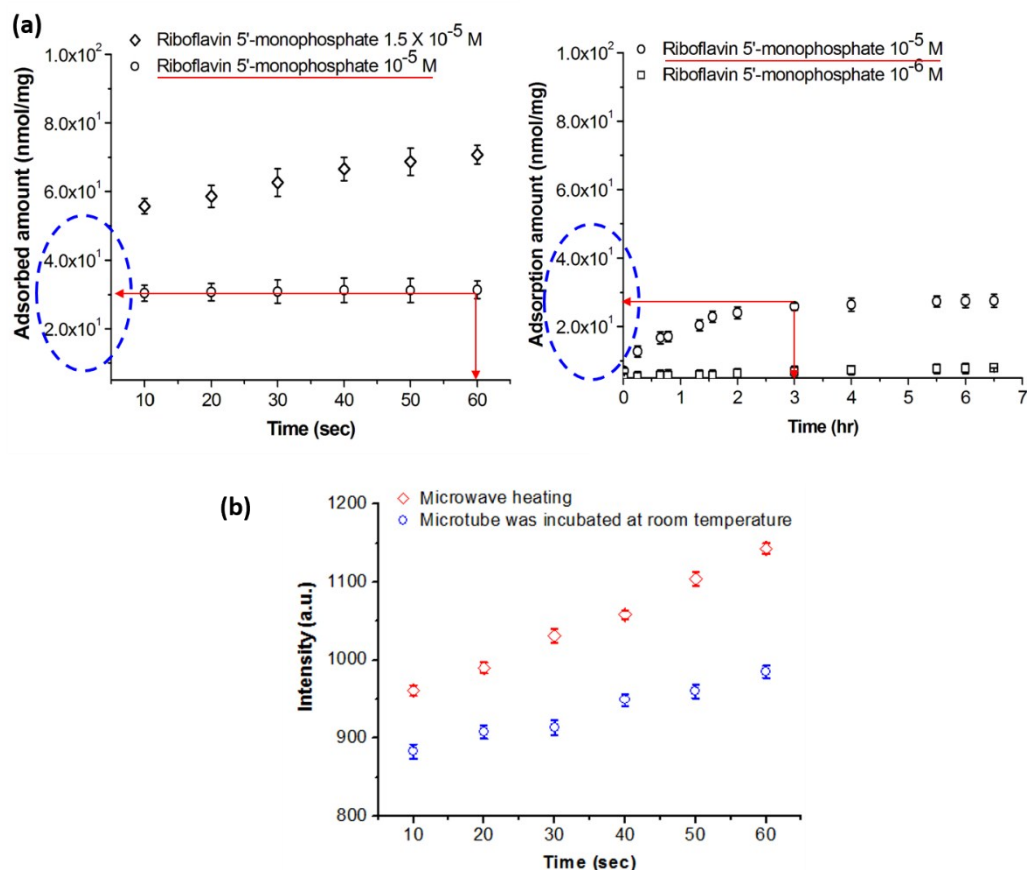

**Fig. S4.** (a) Left panel: the microwave-assisted adsorption of FMNs ( $10^{-5}$  to  $1.5 \times 10^{-5}$  M; marked as diamonds and circles) onto rGO@PDA-Ti<sup>4+</sup> (10 mg/mL, 5  $\mu$ L) surface in acidic buffer (pH 4.5) as a function of time; right panel: adsorption of FMNs ( $10^{-5}$  to  $10^{-6}$  M; marked as circles and squares) onto rGO@PDA-Ti<sup>4+</sup> (10 mg/mL, 5  $\mu$ L) surface in acidic buffer (pH 4.5) under ambient condition as a function of time (b) The changes in the fluorescence intensity ( $\lambda_{em}$  530 nm,  $\lambda_{ex}$  450 nm) of rGO@PDA-Ti<sup>4+</sup>-FMNs (10 mg/mL, 5  $\mu$ L) after incubation with tryptic digest of  $\alpha$ -casein (50  $\mu$ L,  $10^{-5}$  M) under different conditions as a function of time.

## Supporting Information for Publication

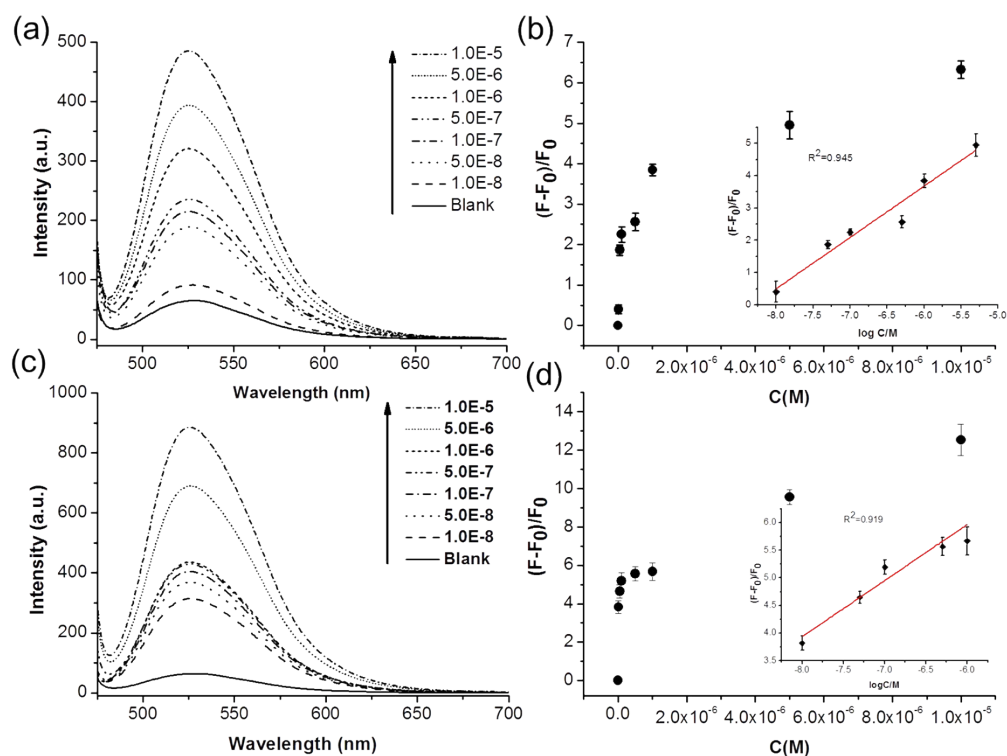

**Fig. S5.** Fluorescence emission spectral changes ( $\lambda_{\text{exc}}$  450 nm) of rGO@PDA-Ti<sup>4+</sup>-FMNs (10 mg/mL, 5  $\mu$ L) at  $\lambda$  530 nm after incubation with the tryptic digests of (a)  $\beta$ -casein and (c) ovalbumin (0, 0.01, 0.05, 0.1, 0.5, 1.0, 5.0, 10.0  $\mu$ M each) under microwave heating for 1 min. (b) and (d) corresponding plots of the relative intensity ((F-F<sub>0</sub>)/F<sub>0</sub>) of rGO@PDA-Ti<sup>4+</sup>-FMNs as a function of the  $\beta$ -casein and ovalbumin concentrations, respectively. Inset: corresponding calibration curves obtained in the linear range (0.05~10  $\mu$ M and 0.01~1.0  $\mu$ M) for  $\beta$ -casein and ovalbumin, respectively. Three replicates were conducted for each experiment.

Supporting Information for Publication

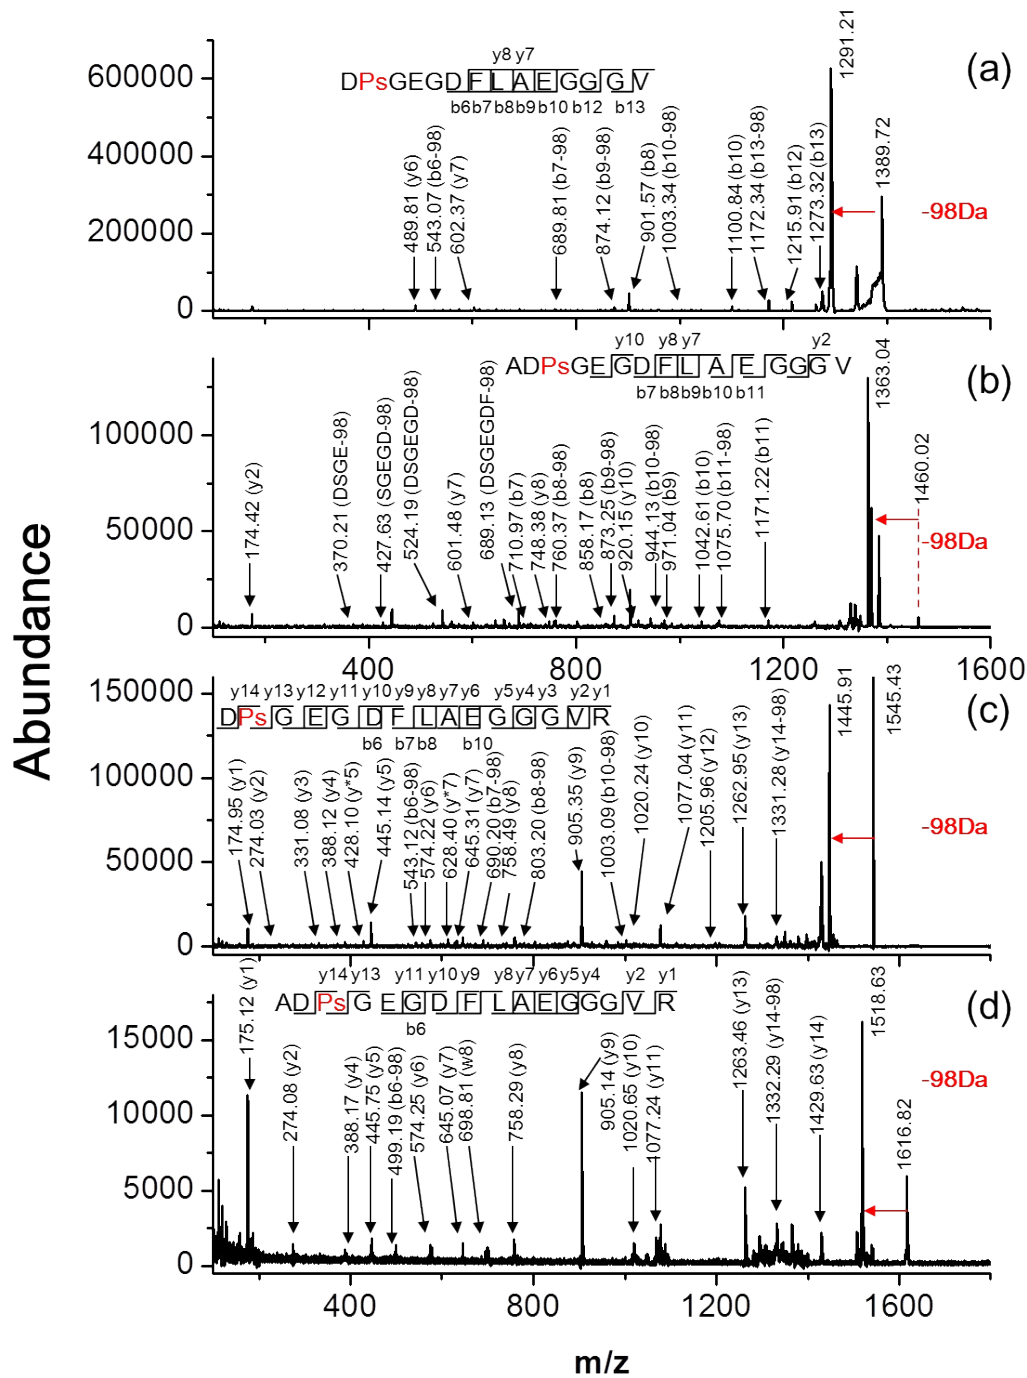

**Fig. S6.** MALDI-TOF/TOF MS/MS spectra of precursor ions of peptides from human serum at  $m/z$  (a) 1389.72, (b) 1460.02, (c) 1545.43, and (d) 1616.82. Each of these precursor ions indicate the presence of the phosphorylated fragment ion adjacent to the parent ion with a mass difference of 98 Da (due to the elimination of Phosphoric acid) in MS/MS spectra.

## Supporting Information for Publication

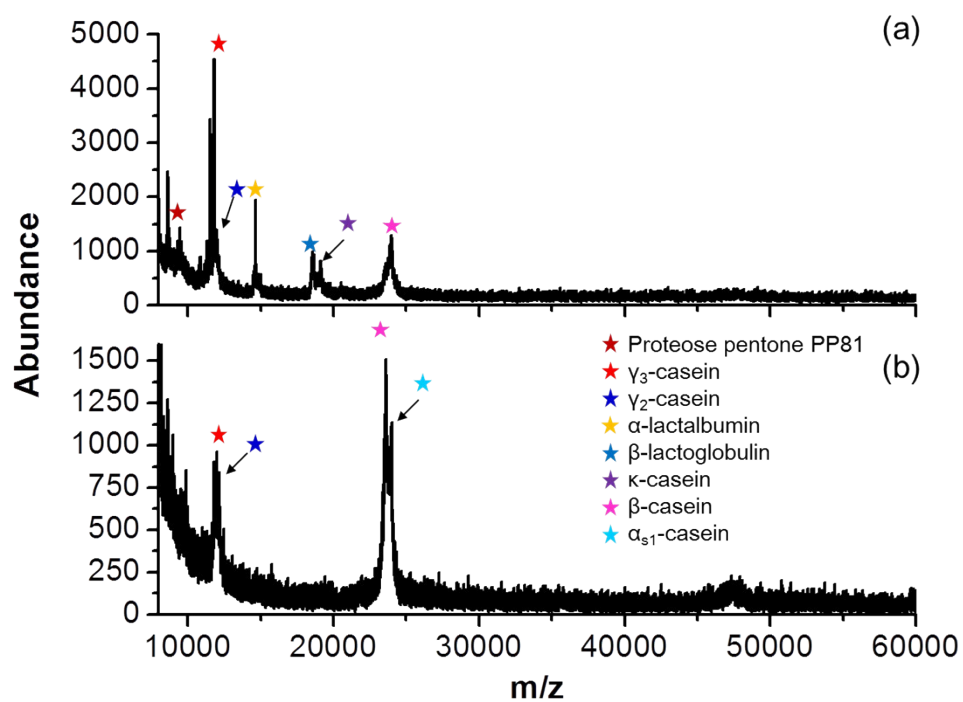

**Fig. S7.** MALDI-TOF mass spectra of a non-fat milk sample: (a) without any treatment, (b) after trapping the target species (rGO@PDA-Ti<sup>4+</sup>-Ps) using rGO@PDA-Ti<sup>4+</sup>-FMNs nanosensor.



## Supporting Information for Publication

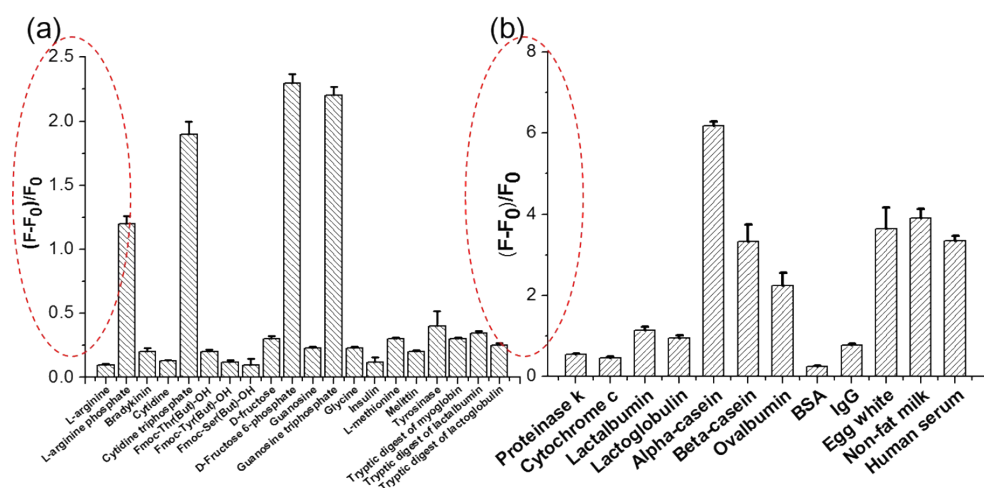

**Fig. S8.** (a) Bar graph showing the relative fluorescence intensity from supernatants of rGO@PDA-Ti<sup>4+</sup>-FMNs (10 mg/ml, 5  $\mu$ L) at  $\lambda$  530 nm after incubation with a variety of biomolecules (10<sup>-5</sup> M, 50  $\mu$ L, containing Ps or without Ps) under microwave heating (1 min) and subsequent centrifugation for 15 min. (b) Bar graph showing the relative fluorescence intensity from supernatants of rGO@PDA-Ti<sup>4+</sup>-FMNs (10 mg/ml, 5  $\mu$ L) at  $\lambda$  530 nm after incubation with a variety of protein (10<sup>-5</sup> M, 50  $\mu$ L) and real samples (50  $\mu$ L) under similar conditions as mentioned above. F stands for the fluorescence intensity of the resulting supernatant, F<sub>0</sub> represents the fluorescence intensity of the blank (only containing rGO@PDA-Ti<sup>4+</sup>-FMNs). Error bars are based on three consecutive measurements.

## Supporting Information for Publication

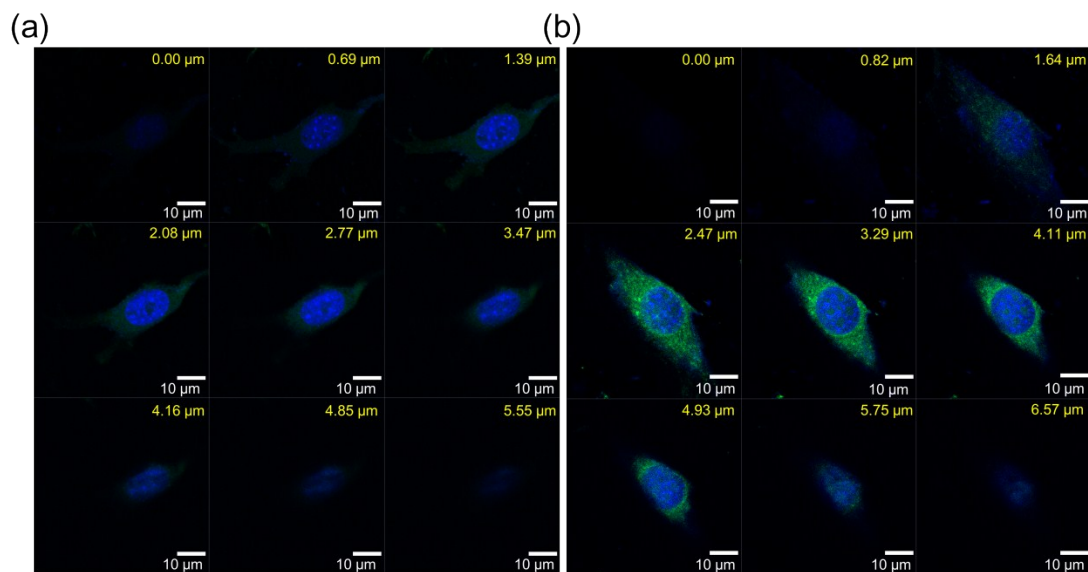

**Fig. S9.** The optical sections of the Tramp-C1 cells treated with (a) FMNs and (b) rGO@PDA-Ti<sup>4+</sup>-FMNs. The experiments were conducted on the Carl-Zeiss confocal laser scanning microscopy.

Supporting Information for Publication

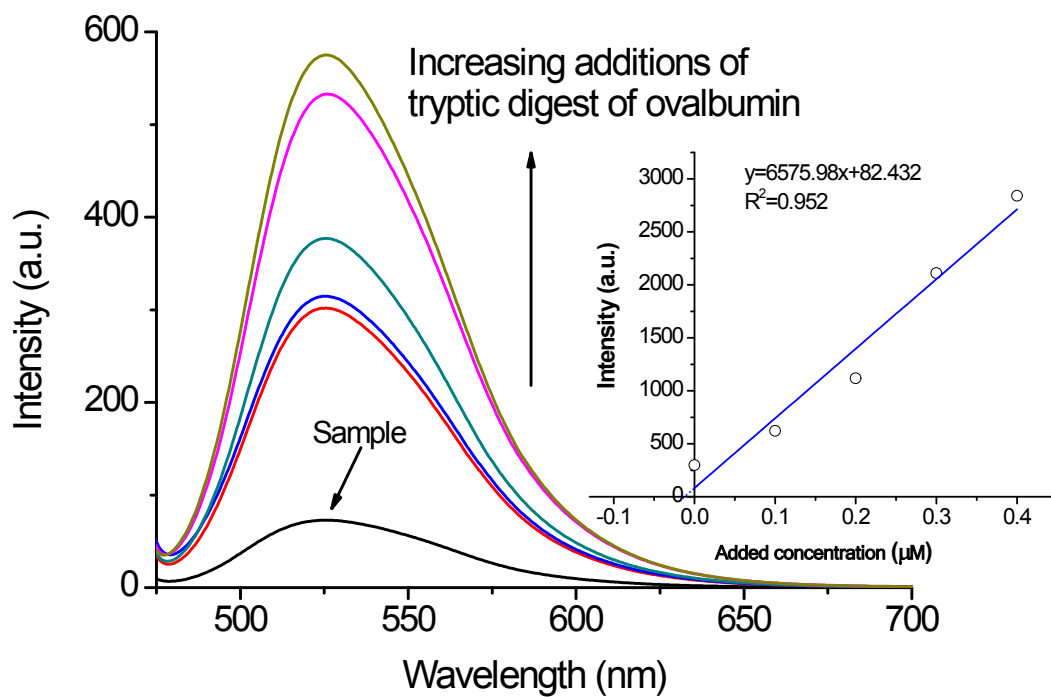

**Fig. S10.** The standard addition experiment for the tryptic digest of egg white sample.

## Supporting Information for Publication

**Table S1.** Data for LOD values for different proteins

| Proteins         | Slope  | Intercept | LOD (M)                | R <sup>2</sup>         |
|------------------|--------|-----------|------------------------|------------------------|
| $\alpha$ -casein | 6.0696 | 46.0872   | $1.185 \times 10^{-7}$ | 0.971                  |
| $\beta$ -casein  | 1.5922 | 13.2344   | $2.89 \times 10^{-8}$  | R <sup>2</sup> = 0.945 |
| ovalbumin        | 1.0154 | 12.0593   | $5.48 \times 10^{-8}$  | R <sup>2</sup> = 0.919 |

**Table S2.** Detailed information of peptide ion peaks with phosphorylated and dephosphorylated fragments observed in the MALDI-TOFMS spectra from tryptic digest of non-fat milk after trapping by rGO@PDA-Ti<sup>4+</sup>-FMNs nanosenosr.

| Observed [M+H] <sup>+</sup> | Theoretical [M+H] <sup>+</sup> | Sequences                                                    | Dephosphorylated fragment [-nHPO <sub>3</sub> ] |
|-----------------------------|--------------------------------|--------------------------------------------------------------|-------------------------------------------------|
| 1253.42                     | 1253.24                        | TVDMME[Ps]TEVF ( $\alpha$ -S2/153-162)                       | -                                               |
| 1660.83                     | 1660.79                        | VPQLEIVPN[Ps]AEER ( $\alpha$ -S1/106-119)                    | -                                               |
| 1951.90                     | 1951.95                        | YKVPQLEIVPN[Ps]AEER ( $\alpha$ -S1/104-119)                  | 1872.13                                         |
| 2061.77                     | 2061.83                        | FQ[Ps]EEQQQTEDELQDK ( $\beta$ /33-52)                        | -                                               |
| 2618.78                     | 2618.90                        | NTMEHV[Ps] [Ps] [Ps] EESII[Ps]QETYS ( $\alpha$ -S2/2-21)     | 2538.83, 2458.49, 2378.87                       |
| 2966.35                     | 2966.16                        | ELEELNVPGEIVE[Ps]L[Ps] [Ps] [Ps] EESITR ( $\beta$ /2-25)     | -                                               |
| 3477.46                     | 3477.85                        | RELEELNVPGEIVE[Ps]L[Ps] [Ps] [Ps]EESITRINK ( $\beta$ /15-43) | -                                               |

Ps represents the phosphorylated species

### Supporting Information for Publication

**Table S3.** Detailed information of peptide ion peaks with phosphorylated and dephosphorylated fragments observed in the MALDI mass spectrum from tryptic digest of chicken egg white after trapping by rGO@PDA-Ti<sup>4+</sup>-FMNs nanosensor.

| Observed [M+H] <sup>+</sup> | Theoretical [M+H] <sup>+</sup> | Sequences                                 | Dephosphorylated fragment [-nHPO <sub>3</sub> ] |
|-----------------------------|--------------------------------|-------------------------------------------|-------------------------------------------------|
| 2088.79                     | 2088.91                        | EVVG[Ps]AEAGVDAASVSEEF<br>R (340-359)     | 2008.83                                         |
| 2512.17                     | 2512.12                        | LPGFGD[Ps]IEAQCGTSVNVH<br>SSLR(62-84)     | -                                               |
| 2902.78                     | 2902.31                        | FDKLPGFGD[Ps]IEAQCGTSV<br>NVHSSLR (59-84) | 2821.18                                         |

Ps represents the phosphorylated species. C represents the carboxymethyl cysteine

## Supporting Information for Publication

**Table S4.** Detailed information of peptide ion peaks with phosphorylated and dephosphorylated fragments observed in the MALDI mass spectrum from human serum after trapping by rGO@PDA-Ti<sup>4+</sup>-FMNs nanosensor.

| Observed [M+H] <sup>+</sup> | Theoretical [M+H] <sup>+</sup> | Sequences                                      | Dephosphorylated fragment [-nHPO <sub>3</sub> ] |
|-----------------------------|--------------------------------|------------------------------------------------|-------------------------------------------------|
| 1389.36                     | 1389.51                        | D[Ps]GEGDFLAEGGGV<br>Fibrinopeptide A (2-15)   | 1309.54                                         |
| 1460.29                     | 1460.55                        | AD[Ps]GEGDFLAEGGGV<br>Fibrinopeptide A (1-15)  | -                                               |
| 1545.38                     | 1545.61                        | D[Ps]GEGDFLAEGGGVR<br>Fibrinopeptide A (2-16)  | -                                               |
| 1616.41                     | 1616.53                        | AD[Ps]GEGDFLAEGGGVR<br>Fibrinopeptide A (1-16) | -                                               |

Ps represents the phosphorylated species
